# Supplementary material for: Assessing anthropogenic risk to sea otters (Enhydra lutris nereis) for reintroduction into San Francisco Bay
Source: PeerJ. 2020 Nov 17;8:e10241. doi: 10.7717/peerj.10241 (PMC7678461; doi:10.7717/peerj.10241)
Supplement: Supplemental Information 3 — Questions and responses from expert opinion surveys used to determine the weights for the stressors. These were used primarily to inform the intensity criteria, and provided helpful information for determining management effectiveness criteria scores as well. [file peerj-08-10241-s003.xlsx]

## Sheet: Sheet1
#01	R: Respondent
1. What is the threat to sea otters posed by each class of vessel traffic? Are there management actions that can be taken to reduce this threat and if so how effective are they?
R: Stress and energy expenditure from repeated disturbance, could be struck by a fast-moving vessel so then injury or death would be likely then. Speed is important because higher speed can cause more serious injury through strike. A speed limit restriction of 5 mph has shown to lessen the impact of vessel strikes; boater education can help with recreational boats and kayaks.
	Shipping intensity = 1
	Ferries = 3
	Recreational = 1
2. What is the impact of legacy metal and organochlorine contaminants on sea otter health? Could you rank from (0,1-3) the severity of this stressor?
R: Not really familiar with the effects to sea otters. They do acquire contaminents but the potential harm is not well understood. Some otters appear to live with no evident side affects even with very high loads. Adult females often have surprisingly low levels of contaminants, but their young pups can test very high, suggesting a possible offloading of contaminants from mother to pup in utero.
	Intensity = 1 or 2
3. What is the threat posed by commercial fishing with gillnet gear? Could you rank from (0,1-3) the severity of this stressor?
R: in the past there have been otters entangled in gill net fisheries in So. California, but don’t think the gear used in this SF fishery poses the same type of risk.
	Intensity = 1
4. What is the threat of oil spills/oil exposure to sea otters? Could you rank from (0,1-3) the severity of an oil spill’s impact? Are there management actions that can be taken to reduce this threat and if so how effective are they?
R: Oiling of otters is serious, can lead to death easily from hypothermia. There is rehabilitation and treatment for oiling that has shown to be effective
	Intensity = 3

## Sheet: Sheet2
#02	R: Respondent
1. What is the threat to sea otters posed by each class of vessel traffic? Are there management actions that can be taken to reduce this threat and if so how effective are they?
R: Cargo ships – are slower moving, follow predictable routes. Not much risk of injury but maybe behavioral disturbance. Otters might likely habituate over time to these vessels and would lessen threat further. Ferries – similarly they follow predictable routs and stick to same areas of the Bay, but speed of these vessels is a concern. Recreational – travel more widely in the Bay and cover more a…
	shipping vessels: 1
	recreational: 1
	ferries: 3
2. What is the impact of legacy metal and organochlorine contaminants on sea otter health? Could you rank from (0,1-3) the severity of this stressor?
R: No good data to quantify the effects yet; we know they do acquire contaminants through prey.
3. What is the threat posed by commercial fishing with gillnet gear? Could you rank from (0,1-3) the severity of this stressor?
R: The gear used in this fishery likely does not pose entanglement risk to otters. (citing southern California bycatch): The mesh in halibut nets was much larger, causing issues, but these nets have small mesh and are set with the mesh pulled really tight so it would be really hard for an otter to get wrapped or stuck in one. It is a short and intensive quota fishery so the time window of presenc…
	intensity: 1
4. What is the threat of oil spills/oil exposure to sea otters? Could you rank from (0,1-3) the severity of an oil spill’s impact? Are there management actions that can be taken to reduce this threat and if so how effective are they?
R: The result of oiling is potentially lethal, but there are good protocols to manage oil spills. California is a leader in developing oil spill response. Has regular training, drills, and protocol reviews; has a sea otter specific plan. The inception of OSPR meant spill prevention (e.g. lots of regulation to lessen potential for spills, innovaiton like the double hull design of ships also decrea…
	intensity: 3 but well managed to mitigate that

## Sheet: Sheet3
#03	R: Respondent
1. What is the threat to sea otters posed by each class of vessel traffic? Are there management actions that can be taken to reduce this threat and if so how effective are they?
R: Cargo ships – Because of the size of the hulls they probably pose little risk of injurying an otter, so just disturbance. Otters might become conditioned to avoid since these vessels have predicatble behavior. Ferries – the high speed is a threat and likely to be very bad if it hit an otter. Recreational – disturbance again but education programs show success in lessening this.
	shipping = 1
	recreational = 1
	ferries = 3
2. What is the impact of legacy metal and organochlorine contaminants on sea otter health? Could you rank from (0,1-3) the severity of this stressor?
R: the effects are not well studied yet but might contribute more to chronic as opposed to acute illness, which could have knock on effects (like higher susceptibility to disease which then leads to death)
	intensity = 2
3. What is the threat posed by commercial fishing with gillnet gear? Could you rank from (0,1-3) the severity of this stressor?
R: bycatch could still be an issue, behavioral disturbance is likely.
	intensity =1
4. What is the threat of oil spills/oil exposure to sea otters? Could you rank from (0,1-3) the severity of an oil spill’s impact? Are there management actions that can be taken to reduce this threat and if so how effective are they?
R: Oiling is still a major risk and even with practiced washing techniques, not convinced that these would diminish the risk posed
	intensity = 3

## Sheet: Sheet4
#04	R: respondent
1. What is the threat to sea otters posed by each class of vessel traffic? Are there management actions that can be taken to reduce this threat and if so how effective are they?
R: recreational boats would cause behavioral disturbance, but could also injure/kill sea otters if motorized and going fast. Don't see cargo ships as big issue, ferries pose big risk because of their high speed .
	shipping = 1
	recreational = 2
	ferries = 3
2. What is the impact of legacy metal and organochlorine contaminants on sea otter health? Could you rank from (0,1-3) the severity of this stressor?
R: studies seem to indicate impacts to liver, immune system; could be an underlying cause of greater susceptibilty to other primary causes of death
	intensity = 2
3. What is the threat posed by commercial fishing with gillnet gear? Could you rank from (0,1-3) the severity of this stressor?
R: similar to other vessel traffic in causing general disturbance if fishing is in proximity to resting or foraging areas.
	intensity =1
4. What is the threat of oil spills/oil exposure to sea otters? Could you rank from (0,1-3) the severity of an oil spill’s impact? Are there management actions that can be taken to reduce this threat and if so how effective are they?
R: Mostly from oiling fur and they can't keep warm, or from ingesting it when they try to groom. Oiled Wildlife Care Network has set up good response in CA so would be able to mobilize quickly to an oil spill in SF and likely help lessen severe impacts.
	intensity = 3

## Sheet: Sheet5
#05	R: Respondent
1. What is the threat to sea otters posed by each class of vessel traffic? Are there management actions that can be taken to reduce this threat and if so how effective are they?
R: recreational boats would cause behavioral disturbance, but could also injure/kill sea otters if motorized and going fast. Don't see cargo ships as big issue, ferries pose big risk because of their high speed .
	shipping = 1
	recreational = 2
	ferries = 3
2. What is the impact of legacy metal and organochlorine contaminants on sea otter health? Could you rank from (0,1-3) the severity of this stressor?
R: not sure.. In other marine mammals there can be extremely high loads, but no apparent sideaffects. Otters would store contaminants more in organs rather than blubber though so the toxic effects might be more severe
	intensity = 2
3. What is the threat posed by commercial fishing with gillnet gear? Could you rank from (0,1-3) the severity of this stressor?
R: was not aware of the practice of gill net fisheries in SF Bay, highly concerned about entanglement and bycatch risk
	intensity =3
4. What is the threat of oil spills/oil exposure to sea otters? Could you rank from (0,1-3) the severity of an oil spill’s impact? Are there management actions that can be taken to reduce this threat and if so how effective are they?
R: oiling damages fur and prevents proper insulation, death is likely outcome. Rehabilitation and washing can be effective if animals are able to be brought into treatment
	intensity = 3

## Sheet: Sheet6
#06	R: Respondent
1. What is the threat to sea otters posed by each class of vessel traffic? Are there management actions that can be taken to reduce this threat and if so how effective are they?
R: cargo ships are very large and do travel fairly fast, would be concerned about possible injury from running over an otter. Ferries definitly pose risk of injury or death because of speed, but may not a problem if they don't overlap with places otters would use. If otters stay in the peripheries near shore and shipping and ferries are mostly concentrated in the open water in the center of the b…
	shipping = 2
	recreational = 1
	ferries = 3
2. What is the impact of legacy metal and organochlorine contaminants on sea otter health? Could you rank from (0,1-3) the severity of this stressor?
R: There is mixed information on this, some have correlated concentrations with adverse health effects but others have not found this. More study is needed, especially in the threshold levels of contaminents that cause health concerns. Evidence from other marine mammals is of limited use because those animals store metals and contaminents in their blubber and otters do not.
	intensity = 2
3. What is the threat posed by commercial fishing with gillnet gear? Could you rank from (0,1-3) the severity of this stressor?
R: This fishery uses different gear than the halibut fisheries that caused bycatch, don't think it is likely that otters would get entangled in nets
	intensity =1
4. What is the threat of oil spills/oil exposure to sea otters? Could you rank from (0,1-3) the severity of an oil spill’s impact? Are there management actions that can be taken to reduce this threat and if so how effective are they?
R: The effects of oiling would be very bad but can be remedied with washing (somethimes). Oil spills still considered a major threat to sea otters despite advances in response and prevention
	intensity = 3

## Sheet: Sheet7
#07	R: Respondent
1. What is the threat to sea otters posed by each class of vessel traffic? Are there management actions that can be taken to reduce this threat and if so how effective are they?
R: chronic behavioral disturbance or injury are likely, SF bay is a heavily trafficked area especially compared to other places w/ sea otters. Would consider vessel traffic the primary threat facing otters there (the one to be most concerned about)
	shipping = 2
	recreational = 2
	ferries = 2
2. What is the impact of legacy metal and organochlorine contaminants on sea otter health? Could you rank from (0,1-3) the severity of this stressor?
R: Don't know enough about this subject to make a determination
3. What is the threat posed by commercial fishing with gillnet gear? Could you rank from (0,1-3) the severity of this stressor?
R: Happens only a short amount of time per year but could overlap with important sea otter habitat (eelgrass). There could be a lot of interaction between the two because of this, causing chronic behavioral disturbance. Would also want to assess recreational fishing and possible entanglement in fishing line, but not as concerned about entanglement in commercial gear
	intensity = 1
4. What is the threat of oil spills/oil exposure to sea otters? Could you rank from (0,1-3) the severity of an oil spill’s impact? Are there management actions that can be taken to reduce this threat and if so how effective are they?
R: oil poses large risk to sea otters, primarily severe consequences like mortality from hypothermia. Rehabilitation can help with rehabilitation but is not always successful
	intensity = 3

## Sheet: Sheet8
#08	R: Respondent
1. What is the threat to sea otters posed by each class of vessel traffic? Are there management actions that can be taken to reduce this threat and if so how effective are they?
R: Large vessels pose less serious threat than fast-moving and smaller boats. Some cases of sea otters being struck and killed or injured by small salmon fishing boats speeding through confined areas, this was helped after imposing 5mph speed limit in the area. So it can be managed with speed restrictions and with boater education.
	shipping = 1
	recreational = 2
	ferries = 2 or 3
2. What is the impact of legacy metal and organochlorine contaminants on sea otter health? Could you rank from (0,1-3) the severity of this stressor?
R: Probably has some chronic adverse health affects we aren't fully aware of yet. Because there are still large unkowns it would be important to monitor and keep in consideration for when there is more information.
	intensity = 1 or 2
3. What is the threat posed by commercial fishing with gillnet gear? Could you rank from (0,1-3) the severity of this stressor?
R: Probably similar to recreational vessels; the fishing boats likely to cause bigger disturbance or threat than the gear type.
	intensity = 1
4. What is the threat of oil spills/oil exposure to sea otters? Could you rank from (0,1-3) the severity of an oil spill’s impact? Are there management actions that can be taken to reduce this threat and if so how effective are they?
R: Oil spills always pose a grave risk but have lots of resources in California to respond to oil spills, e.g. OSPR; otters are able to be treated for oiling but not always successully. The threat from oil exposure itself is very high, but could be offset by mitigaiton
	intensity = 3

## Sheet: Sheet9
#09	R: Respondent
1. What is the threat to sea otters posed by each class of vessel traffic? Are there management actions that can be taken to reduce this threat and if so how effective are they?
R: For most vessels, would say that stress from chronic behavioral disturbance is most likely threat. Injury or death if struck by a high-speed vessel but this doesn't typically happen within the current s. sea otter population, or could be lessened by vessel speed limits. The effects of behavioral disturbance on health needs more study to quantify what the acutal cost is and if it leads to lower…
	shipping = 1
	recreational = 1
	ferries = 2
2. What is the impact of legacy metal and organochlorine contaminants on sea otter health? Could you rank from (0,1-3) the severity of this stressor?
R: In other marine mammals, some negative implications for reproduction and immune function but the same link has not been fully determined in sea otters yet. Contaminents really difficult to study because there are so many different types and forms, and the what concentrations lead to negative effects in the animal can vary individually. Contaminents might be a contributing factor in death from …
	intensity = 2
3. What is the threat posed by commercial fishing with gillnet gear? Could you rank from (0,1-3) the severity of this stressor?
R: could be potential for bycatch but behavioral disturbance from fishing activities is more likely
	intensity = 1
4. What is the threat of oil spills/oil exposure to sea otters? Could you rank from (0,1-3) the severity of an oil spill’s impact? Are there management actions that can be taken to reduce this threat and if so how effective are they?
R: Primary threat is mortality from hypothermia after oiling of fur. Oil spill response has evolved a lot over the years since Exxon Valdez and we have better handle on it now, but still a concern
	intensity = 3

## Sheet: Sheet10
#10	R: respondent
1. What is the threat to sea otters posed by each class of vessel traffic? Are there management actions that can be taken to reduce this threat and if so how effective are they?
R: The main impacts are probably disturbance, and possible injury from high-speed boats. Over time otters would learn to avoid or acclimate areas of intense vessel disturbance and the risk would decrease. The large, rounded hulls from shipping vessels unlikely to cause much harm, but smaller powerboats could cause injury and the very fast ferries could be more lethal. Boater education could lesse…
	shipping = 1
	recreational = 1
	ferries = 3
2. What is the impact of legacy metal and organochlorine contaminants on sea otter health? Could you rank from (0,1-3) the severity of this stressor?
R: Liturature is uncertain what the full impact Is, and some otters appear to live with high contaminent loads with little immediate consequence. Because there is so much unknown still, would rank as a 2 out of caution.
	intensity = 2
3. What is the threat posed by commercial fishing with gillnet gear? Could you rank from (0,1-3) the severity of this stressor?
R: Otters could get tangled in net, behavioral disturbance from proximity of intensive fishing activities. Fishing might overlap with foraging or resting areas in eelgrass causing disturbance and excess energy expenditure from avoidance behavior. Management via observers to document interactions, possible gear modifications if necessary, could help mitigate more serious threats.
	intensity = 1
4. What is the threat of oil spills/oil exposure to sea otters? Could you rank from (0,1-3) the severity of an oil spill’s impact? Are there management actions that can be taken to reduce this threat and if so how effective are they?
R: High intensity threat of death from damaged fur/insulation, or from ingesting oil. Events are very infrequent and with OSPR and the OWCN there are protocols for repsonse to spills.
	intensity = 3
